# Supplementary material for: Design principle for a p-type oxide gate layer on AlGaN/GaN toward normally-off HEMTs: Li-doped NiO as a model
Source: Royal Society of Chemistry journal article supplement (doi:10.1039/c9tc04467a), 2019-12-06
Supplement: c9tc04467a1.pdf [file c9tc04467a1.pdf]

## Supplementary Information

### Design principle for p-type oxide gate layer on AlGaN/GaN toward normally-off HEMTs: Li-doped NiO as model †

Guanjie Li,<sup>a,c</sup> Xiaomin Li,<sup>\*ab</sup> Junliang Zhao,<sup>d</sup> Fawang Yan,<sup>d</sup> Qiuxiang Zhu<sup>a</sup> and Xiangdong Gao<sup>ab</sup>

<sup>a</sup> State Key Laboratory of High Performance Ceramics and Superfine Microstructure, Shanghai Institute of Ceramics, Chinese Academy of Science, No. 1295 Dingxi Road, Shanghai, 200050, PR China

<sup>b</sup> Center of Materials Science and Optoelectronics Engineering, University of Chinese Academy of Science, No. 19A Yuquan Road, Beijing, 100049, PR China

<sup>c</sup> University of Chinese Academy of Science, No. 19A Yuquan Road, Beijing, 100049, PR China

<sup>d</sup> Nanjing NanoArc New Materials Technology Co., Ltd., No. 37 Jiangjun Avenue, Nanjing, 211100, PR China

**\* Corresponding Author:**

Prof. Xiaomin Li: E-mail: [lixm@mail.sic.ac.cn](mailto:lixm@mail.sic.ac.cn); Tel: +86-21-52412554; Fax: +86-21-52413122

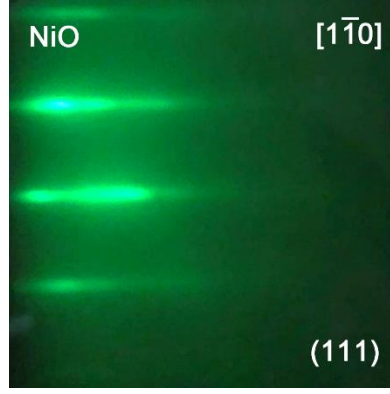

**Fig. S1.** RHEED pattern of NiO thin films on  $\text{Al}_2\text{O}_3$  substrates.

Fig. S1 shows the RHEED pattern of NiO thin films on  $\text{Al}_2\text{O}_3$  substrates. The above similar RHEED pattern with NiO on GaN indicates the similar epitaxial crystal structure of NiO thin films on GaN and  $\text{Al}_2\text{O}_3$  substrates.

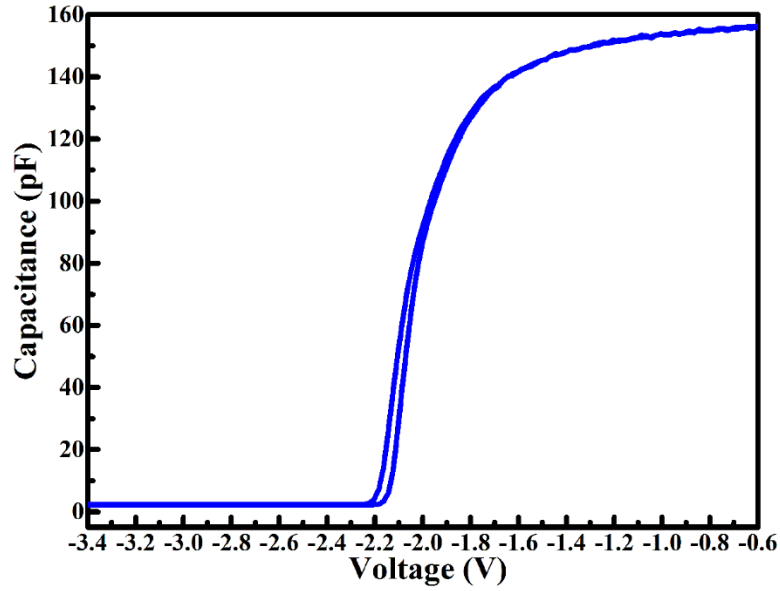

**Fig. S2.** C-V characteristic of  $\text{Pt}/\text{Ni}_{0.75}\text{Li}_{0.25}\text{O}/\text{AlGaIn}/\text{GaN}/\text{Si}$  heterostructure.

Fig. S2 displays C-V curve of  $\text{Pt}/\text{Ni}_{0.75}\text{Li}_{0.25}\text{O}/\text{AlGaIn}/\text{GaN}/\text{Si}$  heterostructure. The small voltage window indicates good interfacial state at  $\text{Ni}_{0.75}\text{Li}_{0.25}\text{O}/\text{AlGaIn}$  interface.

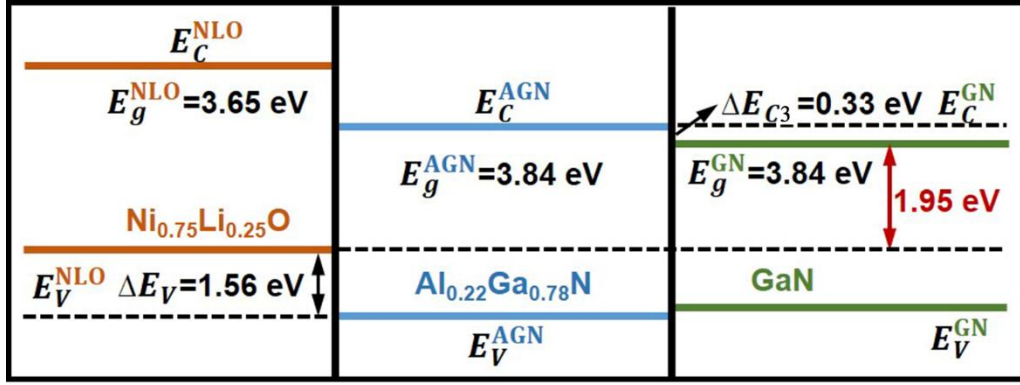

**Fig. S3.** Band alignment of  $Ni_{0.75}Li_{0.25}O/Al_{0.22}Ga_{0.78}N/GaN$  heterostructure.

Fig. S3 shows the band alignment of  $Ni_{0.75}Li_{0.25}O/Al_{0.22}Ga_{0.78}N/GaN$  heterostructure. The ratios of conduction band discontinuities to valence band discontinuities are 75:25 for AlGaN/GaN interface in the reported results.<sup>36</sup> Thus the valance band offset ( $\Delta E_{c3}$ ) value at  $Al_{0.22}Ga_{0.78}N/GaN$  interface is calculated to be 0.33 eV. Therefore, intrinsic  $E_c^{GaN} - E_v^p$  value is determined to be 1.95 eV calculated by  $E_g^{AGN} - \Delta E_v - \Delta E_{c3}$ .
